# Supplementary figures and images for: Evaluation of the Therapeutic Effect of Traditional Chinese Medicine on Osteoarthritis: A Systematic Review and Meta-Analysis
Source: Hindawi journal article supplement (doi:10.1155/2020/5712187), 2020-12-14

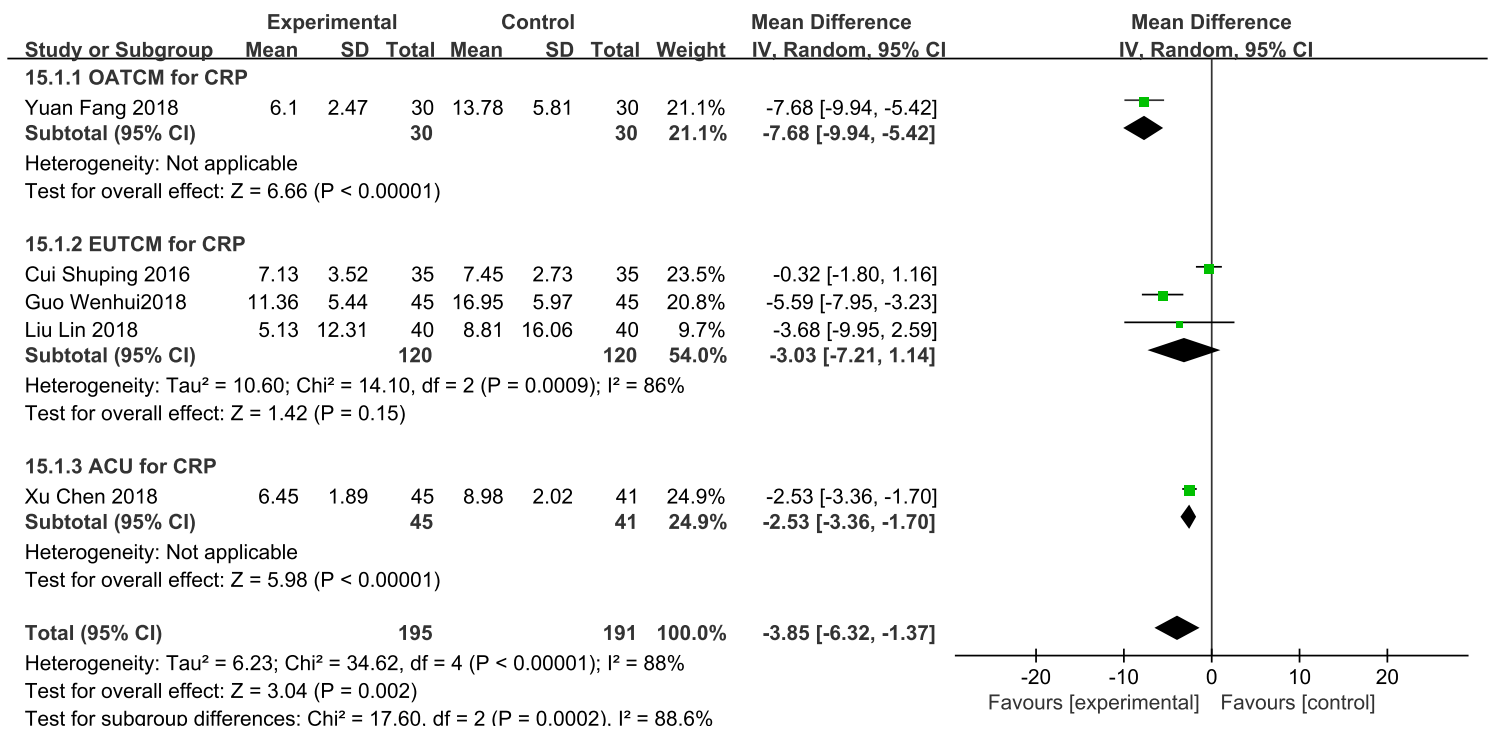

Supplement: f1 [file 5712187.f1.zip]

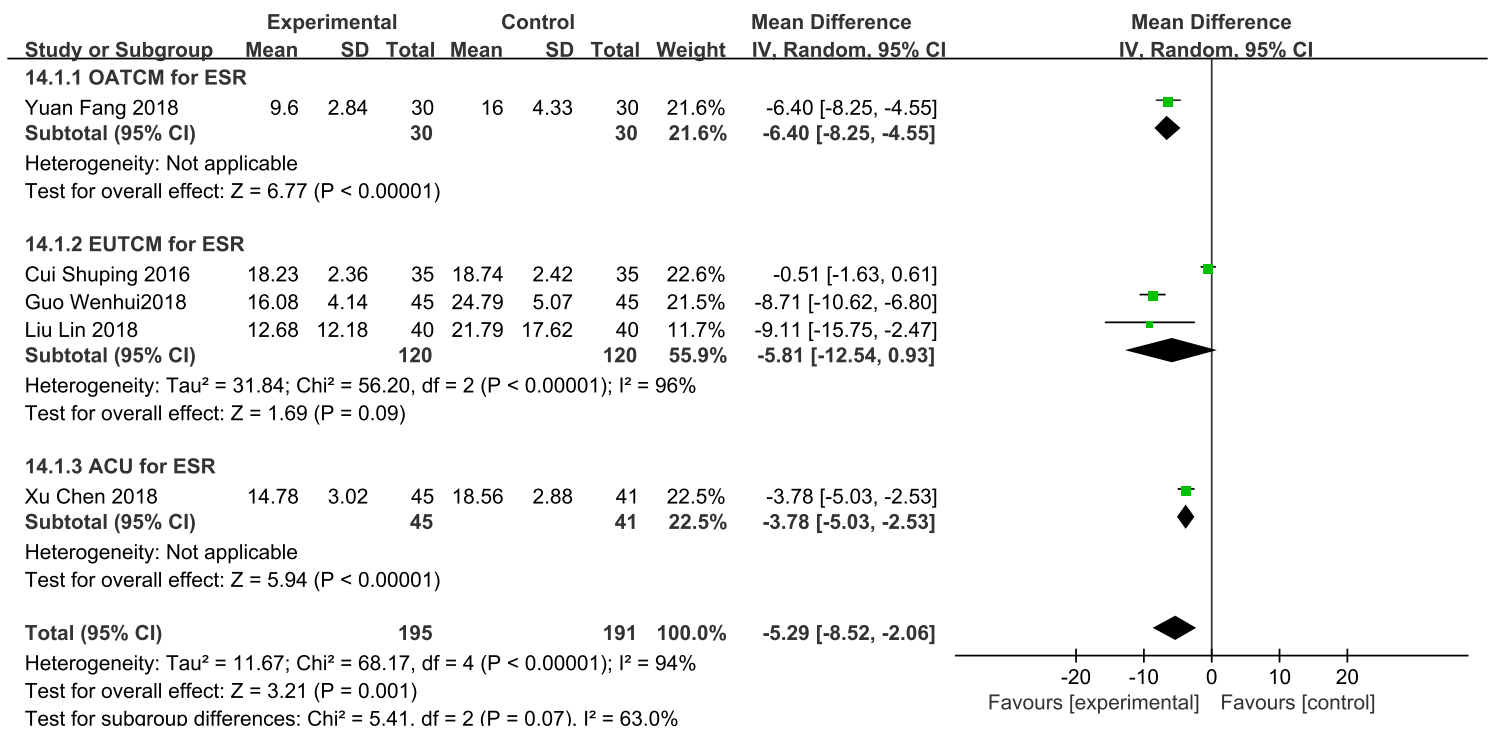

Supplement: f1 [file 5712187.f1.zip]
